# Supplementary material
Source: Springer Nature journal article supplement (https://www.springermedizin.de/resource/supplementary/12957_2012_1192_MOESM2_ESM.pdf/9561986)
Supplement: MOESM2 [file 9561986]

**A****Pancreas tumor**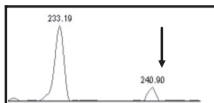**Liver metastasis 1**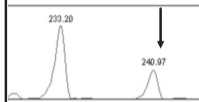**Liver metastasis 2**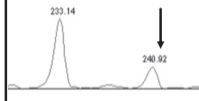**Normal Liver**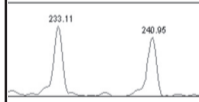**Normal Pancreas**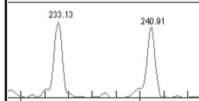230 240  
Size (nt)**B**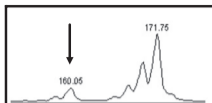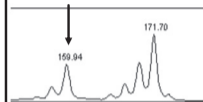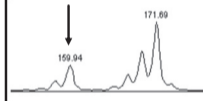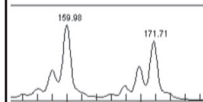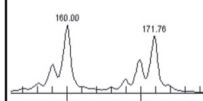160 170  
Size (nt)**C**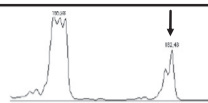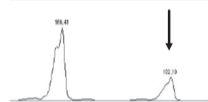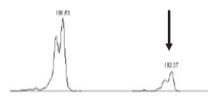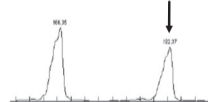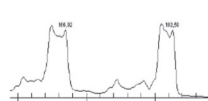160 170  
Size (nt)
